# Supplementary material
Source: HighWire-hosted journal article supplement (https://srh.bmj.com/highwire/filestream/141405/field_highwire_adjunct_files/0/bmjsrh-2020-200986supp001_data_supplement.pdf)
Supplement: bmjsrh-2020-200986supp001_data_supplement.pdf [file bmjsrh-2020-200986supp001_data_supplement.pdf]

**SURVEY QUESTIONS: Sexual healthcare during COVID-19 lockdown in New Zealand.****1a Where do you usually go to see a nurse or doctor (DR) about your health?**

- GP/nurse clinic
- Māori or Pacific clinic
- Youth health clinic (YOSS)
- School clinic
- Student health clinic
- After hours clinic
- Hospital emergency department (ED)
- Other, please state \_\_\_\_\_
- Don't know

**1b Have you ever talked with a nurse or Dr about a sexual health matter?**

This could include talking about staying safe when sexually active, sexually transmitted infections (STIs), an STI or symptom check, contraception or anything else you think is related to your sexual health and wellbeing.

- Yes
- No

*Display This Question: If Have you ever talked with a nurse or Dr about a sexual health matter? This could include talking... = Yes*

**10a Have you ever been tested for sexually transmitted infections (STIs)? STIs are infections like chlamydia and gonorrhoea that are passed on through sexual contact.**

- Yes
- No
- Don't know
- Choose not to answer

*Display This Question: If Have you ever talked with a nurse or Dr about a sexual health matter? This could include talking... = Yes*

**10b Have you ever been treated for an STI?**

- Yes
- No
- Don't know
- Choose not to answer

**Access to healthcare during COVID-19 lockdown**

During the COVID-19 alert level 3-4 nationwide lockdown (24 March - 12 May), our access to healthcare changed. Please answer the following questions about your sexual healthcare needs during this time.

**18 During Lockdown, did you have any sexual health needs (including contraception) that you wanted to talk to a nurse/Dr about?**

- Yes
- No
- Don't know

*Display This Question: If During Lockdown, did you have any sexual health needs (including contraception) that you wanted t... = Yes*

*Or During Lockdown, did you have any sexual health needs (including contraception) that you wanted t... = Don't know*

**19 Did you get help from a nurse/Dr about your sexual health care needs during Lockdown?**

- Yes
- No
- Don't know

*Display This Question: If Did you get help from a nurse/Dr about your sexual health care needs during Lockdown? = Yes*

**20 Where did you get help from? Mark all that apply.**

- Healthline
- My usual GP/Nurse clinic (where I am enrolled)
- A different GP/Nurse clinic (where I am not enrolled)
- Youth health clinic (YOSS)
- Sexual health clinic
- School clinic/Student health clinic
- After hours clinic
- Hospital Emergency department (ED)
- On-line doctor
- Don't know

*Display This Question: If Did you get help from a nurse/Dr about your sexual health care needs during Lockdown? = Yes*

**21 How was help provided to you by the Nurse/Dr?**

- Phone call
- Video call
- In person at the clinic
- Email
- Text
- Messenger

*Display This Question: If How was help provided to you by the Nurse/Dr? = Phone call*

*Or How was help provided to you by the Nurse/Dr? = Video call*

**22 If you had a phone or video call related to sexual health care during the level 3-4 Covid-19 lockdown, how did it go? Choose whether you agree or disagree with the statements below.**

Agree      Neutral      Disagree      Don't know

|                                                                               |                       |                       |                       |                       |
|-------------------------------------------------------------------------------|-----------------------|-----------------------|-----------------------|-----------------------|
| The technology worked well                                                    | <input type="radio"/> | <input type="radio"/> | <input type="radio"/> | <input type="radio"/> |
| The Nurse/Dr I spoke to was someone I knew                                    | <input type="radio"/> | <input type="radio"/> | <input type="radio"/> | <input type="radio"/> |
| I had enough privacy to talk to the Nurse/Dr from my home/place of lockdown   | <input type="radio"/> | <input type="radio"/> | <input type="radio"/> | <input type="radio"/> |
| It was easy to understand what the Nurse/Dr was saying                        | <input type="radio"/> | <input type="radio"/> | <input type="radio"/> | <input type="radio"/> |
| I trusted that what I told the nurse/Dr would be kept confidential            | <input type="radio"/> | <input type="radio"/> | <input type="radio"/> | <input type="radio"/> |
| The Nurse/Dr checked I understood everything                                  | <input type="radio"/> | <input type="radio"/> | <input type="radio"/> | <input type="radio"/> |
| I had enough time to talk about everything I wanted to talk about             | <input type="radio"/> | <input type="radio"/> | <input type="radio"/> | <input type="radio"/> |
| It was easier than going to the clinic                                        | <input type="radio"/> | <input type="radio"/> | <input type="radio"/> | <input type="radio"/> |
| I understood what (if anything) would happen next or what I needed to do next | <input type="radio"/> | <input type="radio"/> | <input type="radio"/> | <input type="radio"/> |

*Display This Question: If Did you get help from a nurse/Dr about your sexual health care needs during Lockdown? = Yes*

**23 Use the slider scale to show how happy you were with the advice, care or treatment you got for your sexual health during Lockdown.**

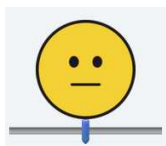

- 1 (Very unhappy face)
- 2 (Unhappy face)
- 3 (Neutral face)
- 4 (Happy face)
- 5 (Very happy face)

*Display This Question: If Did you get help from a nurse/Dr about your sexual health care needs during Lockdown? = No*

**24 What were the reasons for *not* seeking help for your sexual health during Lockdown? Choose all that apply.**

- Tried calling but couldn't get through
- Didn't know who to call
- Didn't think it was important
- Didn't think anywhere was open
- Didn't think I was allowed to during lockdown
- Thought it could wait
- No privacy to make a phonecall
- Don't have my own phone
- No phone credit
- No way to get to a clinic
- Didn't want to leave house during lockdown
- Worried about catching Covid-19 if I went out
- People in my bubble (household) would ask where I was going

Don't know

Other (please say) \_\_\_\_\_

**25 Which method of contact with the nurse/Dr would you most want to use in the following situations?**

|                                                                                   | Clinic visit (in person) | Phone or video call   | Text/email/messaging  | Don't know            |
|-----------------------------------------------------------------------------------|--------------------------|-----------------------|-----------------------|-----------------------|
| To get information or advice about a sexual health matter                         | <input type="radio"/>    | <input type="radio"/> | <input type="radio"/> | <input type="radio"/> |
| If you had symptoms you were worried about                                        | <input type="radio"/>    | <input type="radio"/> | <input type="radio"/> | <input type="radio"/> |
| If you wanted to get checked for STIs                                             | <input type="radio"/>    | <input type="radio"/> | <input type="radio"/> | <input type="radio"/> |
| To get treatment for an STI                                                       | <input type="radio"/>    | <input type="radio"/> | <input type="radio"/> | <input type="radio"/> |
| If you wanted to get condoms/barrier protection                                   | <input type="radio"/>    | <input type="radio"/> | <input type="radio"/> | <input type="radio"/> |
| If you needed contraception (ignore if you don't have female reproductive system) | <input type="radio"/>    | <input type="radio"/> | <input type="radio"/> | <input type="radio"/> |
| If you wanted to discuss HIV medication                                           | <input type="radio"/>    | <input type="radio"/> | <input type="radio"/> | <input type="radio"/> |

**26 STI testing - a test for an STI usually involves taking your own vaginal swab or peeing in a pot at a clinic, but other options for testing might be more appealing to young people. Where might you want to get a free STI test if you needed to? Mark all that apply.**

- At the nurse/Dr clinic
- Pick up a test kit to use at home
- Order a test kit online
- At a mobile clinic (e.g. bus or caravan)
- At a marae
- At a pharmacy
- At a community or Youth centre

**Let us know a bit about who is taking this survey.**

**28 How old are you?**

- 15 - 17 years
- 18 - 19 years
- 20 - 21 years
- 22 - 24 years

**29 Which ethnic group do you belong to? Tick all that apply to you.**

- New Zealand European
- Māori
- Samoan
- Cook Island Māori
- Tongan
- Niuean
- Chinese
- Indian
- Other such as Dutch, Japanese, Tokelauan. Please state. \_\_\_\_\_
- Choose not to answer

**31 What is your gender identity?**

- Female/Wahine
- Male/Tāne
- Transfemale/Whakawahine
- Transmale/Tangata ira tāne
- Genderqueer or gender diverse (state if you wish): \_\_\_\_\_
- Different identity, state if you wish \_\_\_\_\_
- Choose not to answer

**32 Do you consider yourself to be:**

- Heterosexual or straight
- Gay or lesbian
- Bisexual
- Not listed above, state if you wish \_\_\_\_\_
- Don't know
- Choose not to answer

**33 Which of these best describes you? Tick as many as apply.**

- At school or studying
- Working part time
- Working full time
- Looking for work
- Caring for children or another person

- Training/apprenticeship
- Not working or studying or unable to
- Receiving a benefit
- Other, please state \_\_\_\_\_
- Choose not to answer

**34 Which Hawkes Bay town do you live in, or is closest to where you live?**

- Napier
- Hastings
- Havelock North
- Waipukurau
- Wairoa
- Clive
- Waipawa
- Other, state if you wish \_\_\_\_\_
- Choose not to answer
